# Supplementary material
Source: PubMed Central journal article supplement (PMC373385)
Supplement: nar_32_3_893__1.pdf [file nar_32_3_893__1.pdf]

# Supplemental Table 1

Supplemental Table I: Sequence of QRT-PCR primers

| Gene          | Forward Primer 5'→3'     | Reverse Primer 5'→3'     |
|---------------|--------------------------|--------------------------|
| AFX           | TGGAGAACCTGGAGTGTGACAT   | GAGGGCTCAAGGGTAAAGAGTA   |
| AKT1          | ATGATCACCATCACACCACCT    | CTCTCCATCCCTCCAAGCTAT    |
| AKT2          | GGTCGACACAAGGTACTIONCGAT | ATGCTGGCCGAGTAGGAGA      |
| CBL           | CTCTAATGCCAGCTCCTCCTTT   | GCTTTCCGTTTCAAGAGTTGATTC |
| CBLB          | CTGTTTCCCTGAATTCACAACC   | TGCTTAAGTCAGGGATGTTTGA   |
| eIF4EBP       | AGCCCTTCCAGTGATGAGC      | CTTGGTAGTGCTCCACACGAT    |
| FKHR          | CACACAGTGTCAAGACAACGAC   | AAAAGGGAGTTGGTGAAAGACA   |
| GSK3 $\alpha$ | CCCTCAGGAGGAGTTAGTGAGG   | TCTCTCAACGCCATTCTTATCC   |
| GSK3 $\beta$  | CAGCAGCGTCAGATGCTAATAC   | ATTCTTTCCAAACGTGACCAGT   |
| IGF1R         | CTTGTCCAACGAGCAAGTCCT    | CTGATGATCTCCAGGAAGGAAG   |
| IRS1          | AGTTTCCAGAAGCAGCCAGCAG   | GGATGCATCGTACCATCTACTG   |
| mTOR          | CTGCTCATCAAACAAGCGACAT   | ACCATGGTTTTAGTTTAGTGGA   |
| P110 $\alpha$ | ACGTGTGCCATTTGTTTTGAC    | TTATGAAGAGATTGGCATGCTG   |
| P70S6K2       | CATCAGAGACTGACTGCTGCTC   | CTGGTGACTGATTACGGTTCAA   |
| P70S6K1       | ATAAGAGCAAGCGGGATCCTT    | GTGTTTGCCATCATCATAACACA  |
| P85 $\alpha$  | AAGGGAGGTGTGTTGGTAATGTA  | GAGAAGACATGGAATGTTGGAAG  |
| P85 $\beta$   | AGGCAGAGGAGATGCTGAGT     | GTAGATGACGCAGTGCTTGGT    |
| PDK1          | AAAGGTGAAATTCCTTGGTCAC   | CTCCAAACCTTCTGGATCTTC    |
| PTEN          | AGAGCGTGCAGATAATGACAAG   | GGATCAGAGTCAGTGGTGTGAG   |
| S6RP          | GAAGAAGCAGCGTACCAAGAAA   | GAAGTAGAAGCTCGCAGAGAGG   |
| TSC1          | ATAACCCAGGTGTTTGAATTGG   | GTGCCCTACCATGGAATCTG     |
| TSC2          | ACCGATATCTACCCCTCCAAGT   | AGTCTGTGCAGGGGCTTTG      |

Note: 5' and 3' exon primers flanking the 3' most intron of each indicated gene were selected using Primer3 and the following parameters: primer size=22 bp, T<sub>m</sub>=60°C, %GC=50, <4 poly-X, amplicon size 150-250; and BLAST searched against the human genome. The amplification of a single RT-PCR product was confirmed by visualization on agarose gels.
