# Supplementary material
Source: PubMed Central journal article supplement (PMC373385)
Supplement: nar_32_3_893__2.pdf [file nar_32_3_893__2.pdf]

| <u>RNAi ID</u> | <u>Gene Symbol</u> | <u>Accession number</u> | <u>GI number</u> | <u>21mer NA(n19)</u>   | <u>CDS start</u> | <u>CDS end</u> | <u>RNAi start</u> | <u>RNAi end</u> |
|----------------|--------------------|-------------------------|------------------|------------------------|------------------|----------------|-------------------|-----------------|
| 5031804_1      | IRS1               | NM_005544               | 5031804          | CACAAACGCTTCTTCGTA     | 1021             | 4749           | 1096              | 1116            |
| 5031804_10     | IRS1               | NM_005544               | 5031804          | GATAATCGGTTCCGAAAGAGA  | 1021             | 4749           | 2572              | 2592            |
| 5031804_14     | IRS1               | NM_005544               | 5031804          | CAGATCATCAATCCCATCAGA  | 1021             | 4749           | 2953              | 2973            |
| 5031804_16     | IRS1               | NM_005544               | 5031804          | TACTCATTGCCAAGATCCTTT  | 1021             | 4749           | 3313              | 3333            |
| 5031804_32     | IRS1               | NM_005544               | 5031804          | CAGAATGAAGACCTAAATGAC  | 1021             | 4749           | 4768              | 4788            |
| 11068002_1     | IGF1R              | NM_000875               | 11068002         | CATCTTCGAGATGACCAATCT  | 46               | 4149           | 399               | 419             |
| 11068002_12    | IGF1R              | NM_000875               | 11068002         | CATGTA                 | 46               | 4149           | 999               | 1019            |
| 11068002_38    | IGF1R              | NM_000875               | 11068002         | CATCTTACTACATGGGCTGAA  | 46               | 4149           | 1740              | 1760            |
| 11068002_63    | IGF1R              | NM_000875               | 11068002         | GAGAATCCCAATGGATTGATT  | 46               | 4149           | 2611              | 2631            |
| 11068002_111   | IGF1R              | NM_000875               | 11068002         | AAACACATTTGGGATGTTCTT  | 46               | 4149           | 4308              | 4328            |
| 19923111_1     | IGF1               | NM_000618               | 19923111         | GATTTCTTGAAGGTGAAGATG  | 167              | 628            | 218               | 238             |
| 19923111_4     | IGF1               | NM_000618               | 19923111         | GAAGGAAGTACATTTGAAGAA  | 167              | 628            | 565               | 585             |
| 19923111_7     | IGF1               | NM_000618               | 19923111         | CAAGTAGAGGGAGTGCAGGAA  | 167              | 628            | 588               | 608             |
| 19923111_12    | IGF1               | NM_000618               | 19923111         | CAAGAACTACAGGATGTAGGA  | 167              | 628            | 610               | 630             |
| 19923111_36    | IGF1               | NM_000618               | 19923111         | CACAAATGCATGGGTGTTGTA  | 167              | 628            | 930               | 950             |
| 4885060_5      | AKT1               | NM_005163               | 4885060          | CATGAACGAGTTTGAGTACCT  | 199              | 1641           | 636               | 656             |
| 4885060_10     | AKT1               | NM_005163               | 4885060          | CACATTAAGATCACAGACTTC  | 199              | 1641           | 1057              | 1077            |
| 4885060_12     | AKT1               | NM_005163               | 4885060          | GATCATGCAGCATCGCTTCTT  | 199              | 1641           | 1401              | 1421            |
| 4885060_14     | AKT1               | NM_005163               | 4885060          | CAAGATGACAGCATGGAGTGT  | 199              | 1641           | 1558              | 1578            |
| 4885060_16     | AKT1               | NM_005163               | 4885060          | TATTTTCATCCAGTTTGTCTC  | 199              | 1641           | 1852              | 1872            |
| 6715585_17     | AKT2               | NM_001626               | 6715585          | GACAAAGATGGCCACATCAAG  | 204              | 1649           | 1053              | 1073            |
| 6715585_22     | AKT2               | NM_001626               | 6715585          | GACTTTGGCCTCTGCAAAGAG  | 204              | 1649           | 1080              | 1100            |
| 6715585_23     | AKT2               | NM_001626               | 6715585          | GACACAAGGTACTTCGATGAT  | 204              | 1649           | 1506              | 1526            |
| 6715585_24     | AKT2               | NM_001626               | 6715585          | CAAGTACTTCGATGATGAAT   | 204              | 1649           | 1510              | 1530            |
| 19923313_1     | AKT3               | NM_005465               | 19923313         | AAAAACTGGAGGCCAAGATAC  | 1                | 1440           | 58                | 78              |
| 19923313_30    | AKT3               | NM_005465               | 19923313         | GAATGAATTGTAGTCCA      | 1                | 1440           | 347               | 367             |
| 19923313_65    | AKT3               | NM_005465               | 19923313         | CACGTTTCTATGGTGCAGAAA  | 1                | 1440           | 743               | 763             |
| 19923313_84    | AKT3               | NM_005465               | 19923313         | GAAATGATGTGTGGGAGGTTA  | 1                | 1440           | 1012              | 1032            |
| 19923313_12    | AKT3               | NM_005465               | 19923313         | CATTCTGCTACTTCACTGTCA  | 1                | 1440           | 1449              | 1469            |
| 4505694_7      | PDPK1              | NM_002613               | 4505694          | CAAAATCGGTTTCAATCGATGA | 81               | 1751           | 596               | 616             |
| 4505694_12     | PDPK1              | NM_002613               | 4505694          | AAATGAAGATATGCACATCCA  | 81               | 1751           | 719               | 739             |
| 4505694_17     | PDPK1              | NM_002613               | 4505694          | CAGAAGATCATTAAAGTTGGAA | 81               | 1751           | 954               | 974             |
| 4505694_28     | PDPK1              | NM_002613               | 4505694          | CAACATAGAGCAGTACATTCA  | 81               | 1751           | 1310              | 1330            |
| 4505694_34     | PDPK1              | NM_002613               | 4505694          | GATAAGCGGAAGGGTTATTT   | 81               | 1751           | 1470              | 1490            |
| 5453891_1      | PIK3CA             | NM_006218               | 5453891          | GAATGTTTACTACCAAATGGA  | 13               | 3219           | 79                | 99              |

|             |        |           |          |                        |      |      |      |      |
|-------------|--------|-----------|----------|------------------------|------|------|------|------|
| 5453891_54  | PIK3CA | NM_006218 | 5453891  | AAACTAGAAAGTATGTTGCTA  | 13   | 3219 | 694  | 714  |
| 5453891_104 | PIK3CA | NM_006218 | 5453891  | AAAATGGCTTTGAATCTTTGG  | 13   | 3219 | 1330 | 1350 |
| 5453891_170 | PIK3CA | NM_006218 | 5453891  | TACTGAAGAAAGCATTGACTA  | 13   | 3219 | 1970 | 1990 |
| 5453891_293 | PIK3CA | NM_006218 | 5453891  | AATGAAAGCTCACTCTGGATT  | 13   | 3219 | 3234 | 3254 |
| 18560516_1  | PIK3R1 | XM_043865 | 18560516 | AAGAGAAGAAGATATTGACTT  | 43   | 2217 | 93   | 113  |
| 18560516_24 | PIK3R1 | XM_043865 | 18560516 | CAGAATTACGACAGCTTCTTG  | 43   | 2217 | 518  | 538  |
| 18560516_56 | PIK3R1 | XM_043865 | 18560516 | TACTGTAGCCAACAACGGTAT  | 43   | 2217 | 987  | 1007 |
| 18560516_92 | PIK3R1 | XM_043865 | 18560516 | TACATGAATATAACACTCAGT  | 43   | 2217 | 1388 | 1408 |
| 18560516_16 | PIK3R1 | XM_043865 | 18560516 | GATCCTTCTCCTGAAGTTCAG  | 43   | 2217 | 2232 | 2252 |
| 4826907_2   | PIK3R2 | NM_005027 | 4826907  | CATTCAAGGGGAGGAGTGAA   | 242  | 2428 | 1243 | 1263 |
| 4826907_4   | PIK3R2 | NM_005027 | 4826907  | CAATAAGCTGATCAAGTCTT   | 242  | 2428 | 1363 | 1383 |
| 4826907_7   | PIK3R2 | NM_005027 | 4826907  | CAAATACCAGCAGGACCAGAT  | 242  | 2428 | 1519 | 1539 |
| 4826907_12  | PIK3R2 | NM_005027 | 4826907  | CAGATGAAGCGTACTGCAATT  | 242  | 2428 | 1664 | 1684 |
| 4826907_24  | PIK3R2 | NM_005027 | 4826907  | GAAAGAGATGCAAAGGATCCT  | 242  | 2428 | 1786 | 1806 |
| 5453893_1   | PIK3CB | NM_006219 | 5453893  | GATTCACAGATAGCATCTGAT  | 1    | 3213 | 61   | 81   |
| 5453893_52  | PIK3CB | NM_006219 | 5453893  | AAAAACGTTTGACTATTTCATG | 1    | 3213 | 686  | 706  |
| 5453893_99  | PIK3CB | NM_006219 | 5453893  | GAC TTAAAGGACAATTGAGA  | 1    | 3213 | 1339 | 1359 |
| 5453893_146 | PIK3CB | NM_006219 | 5453893  | GATTGTGCCCTCTCTAGATTC  | 1    | 3213 | 1957 | 1977 |
| 5453893_189 | PIK3CB | NM_006219 | 5453893  | CATTCAGCTGAACAGTAGCAA  | 1    | 3213 | 2586 | 2606 |
| 4506248_1   | PTEN   | NM_000314 | 4506248  | GATGGATTCGACTTAGACTTG  | 1035 | 2246 | 1089 | 1109 |
| 4506248_27  | PTEN   | NM_000314 | 4506248  | AAGATCTTGACCAATGGCTAA  | 1035 | 2246 | 1351 | 1371 |
| 4506248_41  | PTEN   | NM_000314 | 4506248  | TATTATAGCTACCTGTTAAAG  | 1035 | 2246 | 1563 | 1583 |
| 4506248_61  | PTEN   | NM_000314 | 4506248  | GATATCAAAGTAGAGTTCTTC  | 1035 | 2246 | 1788 | 1808 |
| 4506248_118 | PTEN   | NM_000314 | 4506248  | CAATAGGACATTGTGTCAGAT  | 1035 | 2246 | 2327 | 2347 |
| 9257221_1   | FOXO1A | NM_002015 | 9257221  | GATCTACGAGTGGATGGTCAA  | 386  | 2353 | 940  | 960  |
| 9257221_13  | FOXO1A | NM_002015 | 9257221  | AACAACAGTAAATTTGCTAAG  | 386  | 2353 | 1160 | 1180 |
| 9257221_23  | FOXO1A | NM_002015 | 9257221  | CAAAGATGGCCTCTACTTTAC  | 386  | 2353 | 1443 | 1463 |
| 9257221_40  | FOXO1A | NM_002015 | 9257221  | TATACAAACACTTCAGGACAA  | 386  | 2353 | 1699 | 1719 |
| 9257221_63  | FOXO1A | NM_002015 | 9257221  | TAAAAGTACTTCAGATTGTCT  | 386  | 2353 | 2376 | 2396 |
| 4503738_2   | FOXO3A | NM_001455 | 4503738  | GACAATAGCAACAAGTATACC  | 925  | 2946 | 1687 | 1707 |
| 4503738_6   | FOXO3A | NM_001455 | 4503738  | GATGAAGTCCAGGACGATGAT  | 925  | 2946 | 1924 | 1944 |
| 4503738_13  | FOXO3A | NM_001455 | 4503738  | CATGTCACACTATGGTAACCA  | 925  | 2946 | 2307 | 2327 |
| 4503738_17  | FOXO3A | NM_001455 | 4503738  | CATGTTCAATGGGAGCTTGGA  | 925  | 2946 | 2766 | 2786 |
| 4503738_28  | FOXO3A | NM_001455 | 4503738  | CAAAGTACACAAGACCTACA   | 925  | 2946 | 2986 | 3006 |
| 5174578_1   | MLLT7  | NM_005938 | 5174578  | GAAATCAGTCATATGCAGAAT  | 183  | 1688 | 475  | 495  |
| 5174578_13  | MLLT7  | NM_005938 | 5174578  | CAGTTCAAATGCCAGCAGTGT  | 183  | 1688 | 950  | 970  |

|             |         |           |          |                        |     |      |      |      |
|-------------|---------|-----------|----------|------------------------|-----|------|------|------|
| 5174578_20  | MLLT7   | NM_005938 | 5174578  | CAAGACAGAATGCCTCAGGAT  | 183 | 1688 | 1557 | 1577 |
| 5174578_29  | MLLT7   | NM_005938 | 5174578  | CATCAGTGACCTCATGGATGA  | 183 | 1688 | 1628 | 1648 |
| 5174578_36  | MLLT7   | NM_005938 | 5174578  | CACTTAGGCTTTGTAGCAAGA  | 183 | 1688 | 1975 | 1995 |
| 11995473_1  | GSK3A   | NM_019884 | 11995473 | GACATCAAAGTGATTGGCAAT  | 115 | 1566 | 475  | 495  |
| 11995473_19 | GSK3A   | NM_019884 | 11995473 | CAAGTTGACCATCCCTATCCT  | 115 | 1566 | 750  | 770  |
| 11995473_25 | GSK3A   | NM_019884 | 11995473 | CACTGATTACACCTCATCCAT  | 115 | 1566 | 996  | 1016 |
| 11995473_35 | GSK3A   | NM_019884 | 11995473 | CATTCTCATCCCTCCTCACTT  | 115 | 1566 | 1428 | 1448 |
| 11995473_37 | GSK3A   | NM_019884 | 11995473 | GACTAGAGGGCAGAGGTAAT   | 115 | 1566 | 1667 | 1687 |
| 21361339_1  | GSK3B   | NM_002093 | 21361339 | CATGAAAGTTAGCAGAGACAA  | 233 | 1534 | 307  | 327  |
| 21361339_33 | GSK3B   | NM_002093 | 21361339 | GAGAAAGCTAGATCACTGTAA  | 233 | 1534 | 535  | 555  |
| 21361339_63 | GSK3B   | NM_002093 | 21361339 | CAATGTTTCGTATATCTGTTC  | 233 | 1534 | 868  | 888  |
| 21361339_74 | GSK3B   | NM_002093 | 21361339 | GAGCAAATCAGAGAAATGAAC  | 233 | 1534 | 1067 | 1087 |
| 21361339_97 | GSK3B   | NM_002093 | 21361339 | AAAAACCACCAGTTACTTGAG  | 233 | 1534 | 1562 | 1582 |
| 4507692_2   | TSC1    | NM_000368 | 4507692  | TATGCTTGAAACACCTTGGT   | 1   | 3495 | 117  | 137  |
| 4507692_27  | TSC1    | NM_000368 | 4507692  | TAGAAACTCATGATGTTGTGA  | 1   | 3495 | 749  | 769  |
| 4507692_62  | TSC1    | NM_000368 | 4507692  | AAAGAAGAAGCTGCAATATCT  | 1   | 3495 | 1429 | 1449 |
| 4507692_80  | TSC1    | NM_000368 | 4507692  | CATAATGCTGCCATGAAAGAT  | 1   | 3495 | 2194 | 2214 |
| 4507692_128 | TSC1    | NM_000368 | 4507692  | AAAAGGATAACCCAGGTGTTT  | 1   | 3495 | 2854 | 2874 |
| 10938006_1  | TSC2    | NM_000548 | 10938006 | TAAACAGACGGAGTTTATCAT  | 19  | 5442 | 117  | 137  |
| 10938006_32 | TSC2    | NM_000548 | 10938006 | CATCAACAGGCAGTTCTATGA  | 19  | 5442 | 1440 | 1460 |
| 10938006_42 | TSC2    | NM_000548 | 10938006 | CAGCATTAAATCTCTTACCATA | 19  | 5442 | 2330 | 2350 |
| 10938006_62 | TSC2    | NM_000548 | 10938006 | CAATGAGTCACAGTCCTTTGA  | 19  | 5442 | 4581 | 4601 |
| 10938006_75 | TSC2    | NM_000548 | 10938006 | CAGACATAGAGGCACAGATTG  | 19  | 5442 | 5522 | 5542 |
| 19924298_2  | FRAP1   | NM_004958 | 19924298 | CACTATGTCACCATGGAACTC  | 80  | 7729 | 215  | 235  |
| 19924298_38 | FRAP1   | NM_004958 | 19924298 | CAGATTCCACAGCTAAAGAAG  | 80  | 7729 | 1658 | 1678 |
| 19924298_92 | FRAP1   | NM_004958 | 19924298 | GATGAAATAGTCACCCTCATG  | 80  | 7729 | 3173 | 3193 |
| 19924298_15 | FRAP1   | NM_004958 | 19924298 | GAGGTTATCCAGTACAAACTT  | 80  | 7729 | 4880 | 4900 |
| 19924298_26 | FRAP1   | NM_004958 | 19924298 | TAGTAAATGCTTCCACTAAAC  | 80  | 7729 | 7779 | 7799 |
| 20149546_1  | RPS6KA1 | NM_002953 | 20149546 | CATTTGAGCTCCTCAAGGTT   | 157 | 2364 | 337  | 357  |
| 20149546_9  | RPS6KA1 | NM_002953 | 20149546 | TATCATTTACAGAGACCTCAA  | 157 | 2364 | 702  | 722  |
| 20149546_17 | RPS6KA1 | NM_002953 | 20149546 | CATGTCTTCTACTCCACCATT  | 157 | 2364 | 1108 | 1128 |
| 20149546_30 | RPS6KA1 | NM_002953 | 20149546 | GAAGAGATTGAGATTCTTCTG  | 157 | 2364 | 1528 | 1548 |
| 20149546_44 | RPS6KA1 | NM_002953 | 20149546 | AAAAATGGCATCAACCACCAT  | 157 | 2364 | 2608 | 2628 |
| 4759049_1   | RPS6KA3 | NM_004586 | 4759049  | GAGAATGGACAGCAAATTATG  | 1   | 2223 | 67   | 87   |
| 4759049_41  | RPS6KA3 | NM_004586 | 4759049  | CAGAAGAAGATGTCAAATTCT  | 1   | 2223 | 497  | 517  |
| 4759049_69  | RPS6KA3 | NM_004586 | 4759049  | CAACGATAGACTGGAATAAAC  | 1   | 2223 | 983  | 1003 |

|             |          |           |          |                        |     |      |      |      |
|-------------|----------|-----------|----------|------------------------|-----|------|------|------|
| 4759049_98  | RPS6KA3  | NM_004586 | 4759049  | AAAAGCAAGAGAGACCCAACA  | 1   | 2223 | 1363 | 1383 |
| 4759049_153 | RPS6KA3  | NM_004586 | 4759049  | GATATTTGGATCCATGGTGTA  | 1   | 2223 | 2238 | 2258 |
| 17158043_1  | RPS6     | NM_001010 | 17158043 | GATGAACGCAAACCTTCGTA   | 43  | 792  | 100  | 120  |
| 17158043_3  | RPS6     | NM_001010 | 17158043 | AACTTCGTA              | 43  | 792  | 109  | 129  |
| 17158043_4  | RPS6     | NM_001010 | 17158043 | TACTTTCTATGAGAAGCGTAT  | 43  | 792  | 117  | 137  |
| 17158043_9  | RPS6     | NM_001010 | 17158043 | GAAAATCAGTTCGTGGTTGCA  | 43  | 792  | 323  | 343  |
| 17158043_16 | RPS6     | NM_001010 | 17158043 | AATCTGAGCGTTCCTCAACTTG | 43  | 792  | 355  | 375  |
| 20070179_1  | EIF4EBP1 | NM_004095 | 20070179 | GATCATCTATGACCGGAAATT  | 65  | 421  | 217  | 237  |
| 20070179_2  | EIF4EBP1 | NM_004095 | 20070179 | CATCTATGACCGGAAATTCCT  | 65  | 421  | 220  | 240  |
| 20070179_3  | EIF4EBP1 | NM_004095 | 20070179 | GAAGAGTCACAGTTTGAGATG  | 65  | 421  | 392  | 412  |
| 20070179_6  | EIF4EBP1 | NM_004095 | 20070179 | GACAAGAACGAACCCCTCCTT  | 65  | 421  | 694  | 714  |
| 4885116_1   | CBL      | NM_005188 | 4885116  | GACAAGAAGATGGTGGAGAAG  | 149 | 2869 | 302  | 322  |
| 4885116_30  | CBL      | NM_005188 | 4885116  | AAAAGACAATAGTCCCTTGA   | 149 | 2869 | 735  | 755  |
| 4885116_62  | CBL      | NM_005188 | 4885116  | GATAAGGATGTAAAGATTGAG  | 149 | 2869 | 1310 | 1330 |
| 4885116_79  | CBL      | NM_005188 | 4885116  | TATTCTGTTGGAGCAGAATCC  | 149 | 2869 | 1802 | 1822 |
| 4885116_113 | CBL      | NM_005188 | 4885116  | GATATCACATCAGTGGTCCA   | 149 | 2869 | 2991 | 3011 |
| 4757919_1   | CBLB     | NM_004351 | 4757919  | GATGCTATTCAGGATGCAGTT  | 323 | 2635 | 401  | 421  |
| 4757919_41  | CBLB     | NM_004351 | 4757919  | CAAACTATCGTACCATGGAA   | 323 | 2635 | 886  | 906  |
| 4757919_63  | CBLB     | NM_004351 | 4757919  | TAATCCTGATTTAACTGGATT  | 323 | 2635 | 1333 | 1353 |
| 4757919_86  | CBLB     | NM_004351 | 4757919  | CAGAACTACCCAGTCACATCA  | 323 | 2635 | 1742 | 1762 |
| 4757919_137 | CBLB     | NM_004351 | 4757919  | TACATCTTAATGGTCAGAATT  | 323 | 2635 | 2650 | 2670 |
| 5032090_1   | SGK      | NM_005627 | 5032090  | CAATTCTCATCGCTTTCATGA  | 43  | 1338 | 107  | 127  |
| 5032090_18  | SGK      | NM_005627 | 5032090  | GAAAGGTTCTTCTAGCAAGAC  | 43  | 1338 | 371  | 391  |
| 5032090_47  | SGK      | NM_005627 | 5032090  | CACTGAACATCGTTTATAGAG  | 43  | 1338 | 686  | 706  |
| 5032090_54  | SGK      | NM_005627 | 5032090  | GAAATGTACGACAACATTCTG  | 43  | 1338 | 952  | 972  |
| 5032090_71  | SGK      | NM_005627 | 5032090  | TATGTGTGTTCCGAATGTTT   | 43  | 1338 | 1369 | 1389 |
| 4557883_1   | INSR     | NM_000208 | 4557883  | CATGGATATCCGGAACAACCT  | 107 | 4255 | 217  | 237  |
| 4557883_30  | INSR     | NM_000208 | 4557883  | CACCAATACGTCATTACAAC   | 107 | 4255 | 1010 | 1030 |
| 4557883_60  | INSR     | NM_000208 | 4557883  | CAGTATGCCATCTTTGTGAAG  | 107 | 4255 | 1868 | 1888 |
| 4557883_80  | INSR     | NM_000208 | 4557883  | CACCTATTTCTACGTGACAGA  | 107 | 4255 | 2923 | 2943 |
| 4557883_111 | INSR     | NM_000208 | 4557883  | GAGTTCAGAGATCGTTCCTAT  | 107 | 4255 | 4362 | 4382 |
| 8051634_1   | XPO1     | NM_003400 | 8051634  | TAGATAATGTGGTGAATTGCT  | 39  | 3254 | 121  | 141  |
| 8051634_61  | XPO1     | NM_003400 | 8051634  | GACCAAATTAATCAGCACATT  | 39  | 3254 | 767  | 787  |
| 8051634_132 | XPO1     | NM_003400 | 8051634  | GAGAGAATTCATGAAGGATAC  | 39  | 3254 | 1361 | 1381 |
| 8051634_196 | XPO1     | NM_003400 | 8051634  | AAAGTACATGTTACTCCCTAA  | 39  | 3254 | 2003 | 2023 |
| 8051634_322 | XPO1     | NM_003400 | 8051634  | AAATCAAATTCATGCTGTTT   | 39  | 3254 | 3254 | 3274 |

|            |         |           |                                |     |      |      |      |
|------------|---------|-----------|--------------------------------|-----|------|------|------|
| 4758953_1  | PPP2R2B | NM_004576 | 4758953 GACATTATCTCTACGGTAGAA  | 526 | 1857 | 598  | 618  |
| 4758953_13 | PPP2R2B | NM_004576 | 4758953 CAGCTTACTTTCTTCTGTCTA  | 526 | 1857 | 833  | 853  |
| 4758953_28 | PPP2R2B | NM_004576 | 4758953 GAGGATTAACCTATGGA ACTT | 526 | 1857 | 1107 | 1127 |
| 4758953_39 | PPP2R2B | NM_004576 | 4758953 GAAATTATCTCTTCGATTTTCG | 526 | 1857 | 1360 | 1380 |
| 4758953_70 | PPP2R2B | NM_004576 | 4758953 TAATCTCACATACTGAATACT  | 526 | 1857 | 1878 | 1898 |
| 5031798_1  | INPP5D  | NM_005541 | 5031798 GAATTGCGTTTACACTTACAG  | 141 | 3707 | 281  | 301  |
| 5031798_12 | INPP5D  | NM_005541 | 5031798 CATCAACATGGTGTCCAAGCT  | 141 | 3707 | 911  | 931  |
| 5031798_38 | INPP5D  | NM_005541 | 5031798 CATCTGTACTGACAACGTGAA  | 141 | 3707 | 1649 | 1669 |
| 5031798_58 | INPP5D  | NM_005541 | 5031798 GATTGAGTTTCTCAGGTGCTA  | 141 | 3707 | 2327 | 2347 |
| 5031798_69 | INPP5D  | NM_005541 | 5031798 GATTTGAGGGTGGAGATATAG  | 141 | 3707 | 4021 | 4041 |

| <u>CDS length-50</u> | <u>Relative RNAi</u> | <u>% of CDS</u> | <u>GC content</u> | <u>rule</u> | <u>sense 19 mer</u>  | <u>antisense 19 mer</u> |            |
|----------------------|----------------------|-----------------|-------------------|-------------|----------------------|-------------------------|------------|
| 3678                 | 25                   | 0.67971724      | 0.47368422        | 2           | CAAACGCTTCTTCGTA     | CAGTACGAAGAAGCGTTG      | 0          |
| 3678                 | 1501                 | 40.8102229      | 0.42105263        | 2           | TAATCGGTTCCGAAAGAGA  | TCTCTTTCGGAACCGATTA     | 0          |
| 3678                 | 1882                 | 51.1691136      | 0.42105263        | 2           | GATCATCAATCCCATCAGA  | TCTGATGGGATTGATGATC     | 0          |
| 3678                 | 2242                 | 60.9570419      | 0.42105263        | 2           | CTCATTGCCAAGATCCTTT  | AAAGGATCTTGGCAATGAG     | 2          |
| 3678                 | 3697                 | 100.516585      | 0.36842105        | 2           | GAATGAAGACCTAAATGAC  | GTCATTTAGGTCTTCATTC     | 0          |
| 4053                 | 303                  | 7.47594375      | 0.42105263        | 2           | TCTTCGAGATGACCAATCT  | AGATTGGTCATCTCGAAGA     | 0          |
| 4053                 | 903                  | 22.2797927      | 0.47368422        | 2           | TGTA                 | TCACAAGGGATGCAGTACA     | 1          |
| 4053                 | 1644                 | 40.5625463      | 0.42105263        | 2           | TCTTACTACATGGGCTGAA  | TTCAGCCCATGTAGTAAGA     | 0          |
| 4053                 | 2515                 | 62.0528004      | 0.36842105        | 2           | GAATCCCAATGGATTGATT  | AATCAATCCATTGGGATTC     | 1          |
| 4053                 | 4212                 | 103.92302       | 0.42105263        | 1           | ACACATTTGGGATGTTCTT  | AGGAACATCCCAAATGTGT     | 0          |
| 411                  | 1                    | 0.243309        | 0.36842105        | 2           | TTTCTTGAAGGTGAAGATG  | CATCTTCACCTTCAAGAAA     | 1          |
| 411                  | 348                  | 84.6715328      | 0.31578946        | 2           | AGGAAGTACATTTGAAGAA  | TTCTTCAAATGTA           | 0          |
| 411                  | 371                  | 90.2676399      | 0.5263158         | 2           | AGTAGAGGGAGTGCAGGAA  | TTCCTGCACTCCCTCTACT     | 0 manually |
| 411                  | 393                  | 95.620438       | 0.42105263        | 2           | AGAACTACAGGATGTAGGA  | TCCTACATCCTGTAGTTCT     | 1          |
| 411                  | 713                  | 173.479319      | 0.42105263        | 2           | CAAATGCATGGGTGTTGTA  | TACAACACCCATGCATTTG     | 0          |
| 1392                 | 387                  | 27.8017241      | 0.42105263        | 2           | TGAACGAGTTTGAGTACCT  | AGGTA                   | 0          |
| 1392                 | 808                  | 58.045977       | 0.36842105        | 2           | CATTAAGATCACAGACTTC  | GAAGTCTGTGATCTTAATG     | 0          |
| 1392                 | 1152                 | 82.7586207      | 0.47368422        | 2           | TCATGCAGCATCGCTTCTT  | AAGAAGCGATGCTGCATGA     | 0          |
| 1392                 | 1309                 | 94.0373563      | 0.47368422        | 2           | AGATGACAGCATGGAGTGT  | ACACTCCATGCTGTCATCT     | 2          |
| 1392                 | 1603                 | 115.158046      | 0.36842105        | 2           | TTTCATCCAGTTTGT      | GAGAACAACTGGATGAAA      | 1          |
| 1395                 | 799                  | 57.2759857      | 0.47368422        | 2           | CAAAGATGGCCACATCAAG  | CTTGATGTGGCCATCTTTG     | 1          |
| 1395                 | 826                  | 59.2114695      | 0.5263158         | 2           | CTTTGGCCTCTGCAAAGAG  | CTCTTTGCAGAGGCCAAAG     | 1          |
| 1395                 | 1252                 | 89.7491039      | 0.42105263        | 2           | CACAAGGTACTTCGATGAT  | ATCATCGAAGTACCTTG       | 0          |
| 1395                 | 1256                 | 90.0358423      | 0.36842105        | 2           | AGGTACTTCGATGATGAAT  | ATTCATCATCGAAGTACCT     | 0          |
| 1389                 | 7                    | 0.50395968      | 0.47368422        | 1           | AAACTGGAGGCCAAGATAC  | GTATCTTGGCCTCCAGTTT     | 1          |
| 1389                 | 296                  | 21.3102952      | 0.31578946        | 2           | ATGAATTGTAGTCCA      | AAGTTGACTACAATTCAT      | 0          |
| 1389                 | 692                  | 49.8200144      | 0.42105263        | 2           | CGTTTCTATGGTGCAGAAA  | TTTCTGCACCATAGAAACG     | 0          |
| 1389                 | 961                  | 69.1864651      | 0.42105263        | 2           | AATGATGTGTGGGAGGTTA  | TAACCTCCCACACATCATT     | 0          |
| 1389                 | 1398                 | 100.647948      | 0.42105263        | 2           | TTCTGCTACTTCACTGTCA  | TGACAGTGAAGTAGCAGAA     | 0          |
| 1620                 | 465                  | 28.7037037      | 0.36842105        | 2           | AAATCGGTTTCATTCGATGA | TCATCGAATGAACCGATTT     | 0          |
| 1620                 | 588                  | 36.2962963      | 0.36842105        | 1           | ATGAAGATATGCACATCCA  | TGGATGTGCATATCTTCAT     | 2          |
| 1620                 | 823                  | 50.8024691      | 0.31578946        | 2           | GAAGATCATTAAGTTGGAA  | TTCCA                   | 0          |
| 1620                 | 1179                 | 72.7777778      | 0.36842105        | 2           | ACATAGAGCAGTACATTCA  | TGAATGTA                | 0          |
| 1620                 | 1339                 | 82.654321       | 0.36842105        | 2           | TAAGCGGAAGGGTTTATTT  | AAATAAACCTTCCGCTTA      | 0          |
| 3156                 | 16                   | 0.50697085      | 0.31578946        | 2           | ATGTTTACTACCAAATGGA  | TCCATTTGGTAGTAAACAT     | 0          |

|      |      |            |            |   |                      |                     |   |
|------|------|------------|------------|---|----------------------|---------------------|---|
| 3156 | 631  | 19.9936629 | 0.31578946 | 1 | AACTAGAAGTATGTTGCTA  | TAGCAACATACTTCTAGTT | 0 |
| 3156 | 1267 | 40.1457541 | 0.36842105 | 1 | AATGGCTTTGAATCTTTGG  | CCAAAGATTCAAAGCCATT | 0 |
| 3156 | 1907 | 60.4245881 | 0.36842105 | 2 | CTGAAGAAAGCATTGACTA  | TAGTCAATGCTTCTTTCAG | 1 |
| 3156 | 3171 | 100.475285 | 0.42105263 | 1 | TGAAAGCTCACTCTGGATT  | AATCCAGAGTGAGCTTTCA | 1 |
| 2124 | 0    | 0          | 0.31578946 | 1 | GAGAAGAAGATATTGACTT  | AAGTCAATATCTTCTTCTC | 1 |
| 2124 | 425  | 20.0094162 | 0.42105263 | 2 | GAATTACGACAGCTTCTTG  | CAAGAAGCTGTCGTAATTC | 0 |
| 2124 | 894  | 42.0903955 | 0.47368422 | 2 | CTGTAGCCAACAACGGTAT  | ATACCGTTGTTGGCTACAG | 0 |
| 2124 | 1295 | 60.9698682 | 0.31578946 | 2 | CATGAATATAACACTCAGT  | ACTGAGTGTTATATTCATG | 1 |
| 2124 | 2139 | 100.706215 | 0.47368422 | 2 | TCCTTCTCCTGAAGTTCAG  | CTGAACTTCAGGAGAAGGA | 2 |
| 2136 | 951  | 44.5224719 | 0.47368422 | 2 | TTTCAAGGGAGGAGGTGAA  | TTCACCTCCTCCCTTGAAA | 2 |
| 2136 | 1071 | 50.1404494 | 0.36842105 | 2 | ATAAGCTGATCAAGGTCTT  | AAGACCTTGATCAGCTTAT | 1 |
| 2136 | 1227 | 57.4438202 | 0.47368422 | 2 | AATACCAGCAGGACCAGAT  | ATCTGGTCTGCTGGTATT  | 0 |
| 2136 | 1372 | 64.2322097 | 0.42105263 | 2 | GATGAAGCGTACTGCAATT  | AATTGCAGTACGCTTCATC | 0 |
| 2136 | 1494 | 69.9438202 | 0.42105263 | 2 | AAGAGATGCAAAGGATCCT  | AGGATCCTTTGCATCTCTT | 1 |
| 3162 | 10   | 0.31625553 | 0.36842105 | 2 | TTCACAGATAGCATCTGAT  | ATCAGATGCTATCTGTGAA | 0 |
| 3162 | 635  | 20.0822264 | 0.31578946 | 1 | AAACGTTTGACTATTCATG  | CATGAATAGTCAAACGTTT | 0 |
| 3162 | 1288 | 40.7337128 | 0.31578946 | 2 | CTTTAAAGGACAATTGAGA  | TCTCAATTGTCTTTAAAG  | 0 |
| 3162 | 1906 | 60.2783049 | 0.47368422 | 2 | TTGTGCCCTCTCTAGATTC  | GAATCTAGAGAGGGCACAA | 0 |
| 3162 | 2535 | 80.170778  | 0.42105263 | 2 | TTCAGCTGAACAGTAGCAA  | TTGCTACTGTTGAGCTGAA | 1 |
| 1161 | 4    | 0.34453058 | 0.42105263 | 2 | TGGATTGCACTTAGACTTG  | CAAGTCTAAGTCGAATCCA | 0 |
| 1161 | 266  | 22.9112834 | 0.42105263 | 1 | GATCTTGACCAATGGCTAA  | TTAGCCATTGGTCAAGATC | 0 |
| 1161 | 478  | 41.171404  | 0.31578946 | 2 | TTATAGCTACCTGTTAAAG  | CTTTAACAGGTAGCTATAA | 0 |
| 1161 | 703  | 60.5512489 | 0.31578946 | 2 | TATCAAAGTAGAGTTCTTC  | GAAGAACTCTACTTTGATA | 1 |
| 1161 | 1242 | 106.976744 | 0.36842105 | 2 | ATAGGACATTGTGTCAGAT  | ATCTGACACAATGCCTAT  | 0 |
| 1917 | 504  | 26.2910798 | 0.47368422 | 2 | TCTACGAGTGGATGGTCAA  | TTGACCATCCACTCGTAGA | 1 |
| 1917 | 724  | 37.7673448 | 0.31578946 | 1 | CAACAGTAAATTTGCTAAG  | CTTAGCAAATTTACTGTTG | 0 |
| 1917 | 1007 | 52.5299948 | 0.42105263 | 2 | AAGATGGCCTCTACTTTAC  | GTAAGTAGAGGCCATCTT  | 0 |
| 1917 | 1263 | 65.8841941 | 0.36842105 | 2 | TACAAACACTTCAGGACAA  | TTGTCCTGAAGTGTTTGTA | 1 |
| 1917 | 1940 | 101.199791 | 0.31578946 | 2 | AAAGTACTTCAGATTGTCT  | AGACAATCTGAAGTACTTT | 0 |
| 1971 | 712  | 36.123795  | 0.36842105 | 2 | CAATAGCAACAAGTATAACC | GGTATACTTGTGCTATTG  | 0 |
| 1971 | 949  | 48.1481481 | 0.47368422 | 2 | TGAAGTCCAGGACGATGAT  | ATCATCGTCTGGACTTCA  | 2 |
| 1971 | 1332 | 67.5799087 | 0.42105263 | 2 | TGTCACACTATGGTAACCA  | TGGTTACCATAGTGTGACA | 0 |
| 1971 | 1791 | 90.8675799 | 0.47368422 | 2 | TGTTCAATGGGAGCTTGGA  | TCCAAGCTCCCATTGAACA | 0 |
| 1971 | 2011 | 102.029427 | 0.42105263 | 2 | AACTGACACAAGACCTACA  | TGTAGGTCTTGTGTCAGTT | 0 |
| 1455 | 242  | 16.6323024 | 0.31578946 | 2 | AATCAGTCATATGCAGAAT  | ATTCTGCATATGACTGATT | 1 |
| 1455 | 717  | 49.2783505 | 0.47368422 | 2 | GTTCAAATGCCAGCAGTGT  | ACACTGCTGGCATTGAAAC | 0 |

|      |      |            |            |   |                      |                      |   |
|------|------|------------|------------|---|----------------------|----------------------|---|
| 1455 | 1324 | 90.9965636 | 0.47368422 | 2 | AGACAGAATGCCTCAGGAT  | ATCCTGAGGCATTCTGTCT  | 0 |
| 1455 | 1395 | 95.8762887 | 0.47368422 | 2 | TCAGTGACCTCATGGATGA  | TCATCCATGAGGTCACTGA  | 0 |
| 1455 | 1742 | 119.725086 | 0.42105263 | 2 | CTTAGGCTTTGTAGCAAGA  | TCTTGCTACAAAGCCTAAG  | 0 |
| 1401 | 310  | 22.1270521 | 0.36842105 | 2 | CATCAAAGTGATTGGCAAT  | ATTGCCAATCACTTTGATG  | 1 |
| 1401 | 585  | 41.7558887 | 0.47368422 | 2 | AGTTGACCATCCCTATCCT  | AGGATAGGGATGGTCAACT  | 0 |
| 1401 | 831  | 59.3147752 | 0.42105263 | 2 | CTGATTACACCTCATCCAT  | ATGGATGAGGTGTAATCAG  | 0 |
| 1401 | 1263 | 90.1498929 | 0.47368422 | 2 | TTCTCATCCCTCCTCACTT  | AAGTGAGGAGGGATGAGAA  | 4 |
| 1401 | 1502 | 107.209136 | 0.47368422 | 2 | CTAGAGGGCAGAGGTAAT   | ATTTACCTCTGCCCTCTAG  | 1 |
| 1251 | 24   | 1.91846523 | 0.36842105 | 2 | TGAAAGTTAGCAGAGACAA  | TTGTCTCTGCTAACTTTCA  | 0 |
| 1251 | 252  | 20.1438849 | 0.36842105 | 2 | GAAAGCTAGATCACTGTAA  | TTACAGTGATCTAGCTTTC  | 0 |
| 1251 | 585  | 46.7625899 | 0.31578946 | 2 | ATGTTTCGTATATCTGTTC  | GAACAGATATACGAAACAT  | 0 |
| 1251 | 784  | 62.6698641 | 0.36842105 | 2 | GCAAATCAGAGAAATGAAC  | GTTCAATTTCTCTGATTTGC | 0 |
| 1251 | 1279 | 102.238209 | 0.42105263 | 1 | AAACCACCAGTTACTTGAG  | CTCAAGTAACTGGTGGTTT  | 0 |
| 3444 | 66   | 1.91637631 | 0.42105263 | 2 | TGCTTGTAACACCTTGGT   | ACCAAGGTGTTTACAAGCA  | 0 |
| 3444 | 698  | 20.2671312 | 0.36842105 | 2 | GAAACTCATGATGTTGTGA  | TCACAACATCATGAGTTTC  | 1 |
| 3444 | 1378 | 40.0116144 | 0.36842105 | 1 | AGAAGAAGCTGCAATATCT  | AGATATTGCAGCTTCTTCT  | 1 |
| 3444 | 2143 | 62.224158  | 0.36842105 | 2 | TAATGCTGCCATGAAAGAT  | ATCTTTCATGGCAGCATT   | 0 |
| 3444 | 2803 | 81.387921  | 0.42105263 | 1 | AAGGATAACCCAGGTGTTT  | AAACACCTGGGTATCCTT   | 1 |
| 5373 | 48   | 0.89335567 | 0.36842105 | 2 | AACAGACGGAGTTTATCAT  | ATGATAAACTCCGTCTGTT  | 0 |
| 5373 | 1371 | 25.5164712 | 0.42105263 | 2 | TCAACAGGCAGTTCTATGA  | TCATAGAACTGCCTGTTGA  | 0 |
| 5373 | 2261 | 42.0807742 | 0.31578946 | 2 | GCATTAATCTCTTACCATA  | TATGGTAAGAGATTAATGC  | 0 |
| 5373 | 4512 | 83.9754327 | 0.42105263 | 2 | ATGAGTCACAGTCCTTTGA  | TCAAAGGACTGTGACTCAT  | 0 |
| 5373 | 5453 | 101.488926 | 0.47368422 | 2 | GACATAGAGGCACAGATTG  | CAATCTGTGCCTCTATGTC  | 2 |
| 7599 | 85   | 1.11856823 | 0.47368422 | 2 | CTATGTCACCATGGAACTC  | GAGTTCATGGTGACATAG   | 0 |
| 7599 | 1528 | 20.1079089 | 0.42105263 | 2 | GATTCCACAGCTAAAGAAG  | CTTCTTTAGCTGTGGAATC  | 2 |
| 7599 | 3043 | 40.0447427 | 0.42105263 | 2 | TGAAATAGTCACCCCTCATG | CATGAGGGTGACTATTTCA  | 0 |
| 7599 | 4750 | 62.5082248 | 0.36842105 | 2 | GGTTATCCAGTACAAACTT  | AAGTTTGTACTGGATAACC  | 0 |
| 7599 | 7649 | 100.657981 | 0.36842105 | 2 | GTAATGCTTCCACTAAAC   | GTTTAGTGAAGCATTTAC   | 0 |
| 2157 | 130  | 6.0268892  | 0.47368422 | 2 | TTTCGAGCTCCTCAAGGTT  | AACCTTGAGGAGCTCGAAA  | 1 |
| 2157 | 495  | 22.9485396 | 0.36842105 | 2 | TCATTTACAGAGACCTCAA  | TTGAGGTCTCTGTAAATGA  | 1 |
| 2157 | 901  | 41.7709782 | 0.42105263 | 2 | TGTCTTCTACTCCACCATT  | AATGGTGGAGTAGAAGACA  | 1 |
| 2157 | 1321 | 61.2424664 | 0.36842105 | 2 | AGAGATTGAGATTCTTCTG  | CAGAAGAATCTCAATCTCT  | 2 |
| 2157 | 2401 | 111.312007 | 0.42105263 | 1 | AAATGGCATCAACCACCAT  | ATGGTGGTTGATGCCATTT  | 0 |
| 2172 | 16   | 0.73664825 | 0.36842105 | 2 | GAATGGACAGCAAATTATG  | CATAATTTGCTGTCCATTC  | 0 |
| 2172 | 446  | 20.53407   | 0.31578946 | 2 | GAAGAAGATGTCAAATTCT  | AGAATTTGACATCTTCTTC  | 1 |
| 2172 | 932  | 42.9097606 | 0.36842105 | 2 | ACGATAGACTGGAATAAAC  | GTTTATTCCAGTCTATCGT  | 0 |



|      |      |            |            |   |                     |                       |            |
|------|------|------------|------------|---|---------------------|-----------------------|------------|
| 2172 | 1312 | 60.4051565 | 0.47368422 | 1 | AAGCAAGAGAGACCCAACA | TGTTGGGTCTCTTTGCTT    | 1          |
| 2172 | 2187 | 100.690608 | 0.36842105 | 2 | TATTTGGATCCATGGTGTA | TACACCATGGATCCAAATA   | 0          |
| 699  | 7    | 1.00143062 | 0.42105263 | 2 | TGAACGCAAACCTTCGTA  | AGTACGAAGTTTGCCTTCA   | 0          |
| 699  | 16   | 2.28898426 | 0.36842105 | 1 | ACTTCGTA            | CTCATAGAAAGTACGAAGT   | 0 manually |
| 699  | 24   | 3.43347639 | 0.36842105 | 2 | CTTTCTATGAGAAGCGTAT | ATACGCTTCTCATAGAAAG   | 0 manually |
| 699  | 230  | 32.9041488 | 0.42105263 | 2 | AAATCAGTTCGTGGTTGCA | TGCAACCACGAACTGATTT   | 0          |
| 699  | 262  | 37.4821173 | 0.47368422 | 1 | TCTGAGCGTTCTCAACTTG | CAAGTTGAGAACGCTCAGA   | 1 manually |
| 306  | 102  | 33.3333333 | 0.36842105 | 2 | TCATCTATGACCGGAAATT | AATTTCCGGTCATAGATGA   | 0          |
| 306  | 105  | 34.3137255 | 0.42105263 | 2 | TCTATGACCGGAAATTCCT | AGGAATTTCCGGTCATAGA   | 0          |
| 306  | 277  | 90.5228758 | 0.42105263 | 2 | AGAGTCACAGTTTGAGATG | CATCTCAA              | 1          |
| 306  | 579  | 189.215686 | 0.47368422 | 2 | CAAGAACGAACCTTCCTT  | AAGGAAGGGTTCGTTCTTG   | 0          |
| 2670 | 103  | 3.8576779  | 0.47368422 | 2 | CAAGAAGATGGTGGAGAAG | CTTCTCCACCATCTTCTTG   | 7          |
| 2670 | 536  | 20.0749064 | 0.42105263 | 1 | AAGACAATAGTCCCTTGA  | TCCAAGGGACTATTGTCTT   | 0          |
| 2670 | 1111 | 41.6104869 | 0.31578946 | 2 | TAAGGATGTAAAGATTGAG | CTCAATCTTTACATCCTTA   | 3          |
| 2670 | 1603 | 60.0374532 | 0.47368422 | 2 | TTCTGTTGGAGCAGAATCC | GGATTCTGCTCCAACAGAA   | 1          |
| 2670 | 2792 | 104.569288 | 0.42105263 | 2 | TATCACATCAGTGGTTCCA | TGGAACCACTGATGTGATA   | 0          |
| 2262 | 28   | 1.23784262 | 0.42105263 | 2 | TGCTATTCAGGATGCAGTT | AACTGCATCCTGAATAGCA   | 1          |
| 2262 | 513  | 22.6790451 | 0.36842105 | 2 | AACTATCGTACCATGGAA  | TTCCATGGTACGATAGTTT   | 0          |
| 2262 | 960  | 42.4403183 | 0.31578946 | 2 | ATCCTGATTTAACTGGATT | AATCCAGTTAAATCAGGAT   | 1          |
| 2262 | 1369 | 60.5216622 | 0.47368422 | 2 | GA                  | TGATGTGACTGGT         | 1          |
| 2262 | 2277 | 100.66313  | 0.31578946 | 2 | CATCTTAATGGTCAGAATT | AATTCTGACCATTAAGATG   | 3          |
| 1245 | 14   | 1.12449799 | 0.36842105 | 2 | ATTCTCATCGCTTTTATGA | TCATGAAAGCGATGAGAAT   | 0          |
| 1245 | 278  | 22.3293173 | 0.42105263 | 2 | AAGGTTCTTCTAGCAAGAC | GTCTTGCTAGAAGAACCTT   | 0          |
| 1245 | 593  | 47.6305221 | 0.36842105 | 2 | CTGAACATCGTTTATAGAG | CTCTATAAACGATGTTTACAG | 0          |
| 1245 | 859  | 68.9959839 | 0.36842105 | 2 | AATGTACGACAACATTCTG | CAGAATGTTGTCGTACATT   | 0          |
| 1245 | 1276 | 102.48996  | 0.36842105 | 2 | TGTGTGTTTCCGAATGTTT | AAACATTCGAAACACACA    | 0          |
| 4098 | 60   | 1.46412884 | 0.47368422 | 2 | TGGATATCCGGAACAACCT | AGGTTGTTCCGGATATCCA   | 0          |
| 4098 | 853  | 20.8150317 | 0.42105263 | 2 | CCAATACGTCATTCACAAC | GTTGTGAATGACGTATTGG   | 0          |
| 4098 | 1711 | 41.7520742 | 0.42105263 | 2 | GTATGCCATCTTTGTGAAG | CTTCACAAAGATGGCATA    | 1          |
| 4098 | 2766 | 67.4963397 | 0.42105263 | 2 | CCTATTTCTACGTGACAGA | TCTGTACGTAGAAATAGG    | 0          |
| 4098 | 4205 | 102.61103  | 0.42105263 | 2 | GTTCAGAGATCGTTCCTAT | ATAGGAACGATCTCTGAAC   | 0          |
| 3165 | 32   | 1.01105845 | 0.36842105 | 2 | GATAATGTGGTGAATTGCT | AGCAATTCACCACATTATC   | 0          |
| 3165 | 678  | 21.4218009 | 0.31578946 | 2 | CCAAATTAATCAGCACATT | AATGTGCTGATTAATTTGG   | 0          |
| 3165 | 1272 | 40.1895735 | 0.36842105 | 2 | GAGAATTCATGAAGGATAC | GTATCCTTCATGAATTCTC   | 0          |
| 3165 | 1914 | 60.4739336 | 0.36842105 | 1 | AGTACATGTTACTCCCTAA | TTAGGGAGTAACATGTA     | 0          |
| 3165 | 3165 | 100        | 0.31578946 | 1 | ATCCAATTCATGCTGTTT  | AAACAGCATGAATTTGGAT   | 0          |

|      |      |            |            |   |                      |                     |   |
|------|------|------------|------------|---|----------------------|---------------------|---|
| 1281 | 22   | 1.71740827 | 0.36842105 | 2 | CATTATCTCTACGGTAGAA  | TTCTACCGTAGAGATAATG | 0 |
| 1281 | 257  | 20.0624512 | 0.36842105 | 2 | GCTTACTTTCTTCTGTCTA  | TAGACAGAAGAAAGTAAGC | 2 |
| 1281 | 531  | 41.4519906 | 0.36842105 | 2 | GGATTAACCTATGGAACCTT | AAGTTCCATAGGTTAATCC | 0 |
| 1281 | 784  | 61.2021858 | 0.31578946 | 2 | AATTATCTCTTCGATTTTCG | CGAAATCGAAGAGATAATT | 0 |
| 1281 | 1302 | 101.639344 | 0.31578946 | 2 | ATCTCACATACTGAATACT  | AGTATTCAGTATGTGAGAT | 0 |
| 3516 | 90   | 2.55972696 | 0.36842105 | 2 | ATTGCGTTTACACTTACAG  | CTGTAAGTGAAACGCAAT  | 0 |
| 3516 | 720  | 20.4778157 | 0.47368422 | 2 | TCAACATGGTGTCCAAGCT  | AGCTTGGACACCATGTTGA | 1 |
| 3516 | 1458 | 41.4675768 | 0.42105263 | 2 | TCTGTAAGTGTCCAAGCT   | TTCACGTTGTCAGTACAGA | 0 |
| 3516 | 2136 | 60.7508532 | 0.42105263 | 2 | TTGAGTTTCTCAGGTGCTA  | TAGCACCTGAGAACTCAA  | 0 |
| 3516 | 3830 | 108.930603 | 0.42105263 | 2 | TTTGAGGGTGGAGATATAG  | CTATATCTCCACCCTCAA  | 0 |
