# Supplementary material
Source: PubMed Central journal article supplement (PMC373385)
Supplement: nar_32_3_893__3.pdf [file nar_32_3_893__3.pdf]

Suppl. Table III siRNA duplexes

|          |                                                                                                                             |        |                                                                                                                             |         |                                                                                                                            |
|----------|-----------------------------------------------------------------------------------------------------------------------------|--------|-----------------------------------------------------------------------------------------------------------------------------|---------|----------------------------------------------------------------------------------------------------------------------------|
| AKT1     | CATGAACGAGTTTGAGTACCT<br>CACATTAAGATCACAGACTTC<br>GATCATGCAGCATCGCTTCTT<br>CAAGATGACAGCATGGAGTGT<br>TATTTTCATCCAGTTTGTCTC   | IGF1   | GATTTCTTGAAGGTGAAGATG<br>GAAGGAAGTACATTTGAAGAA<br>CAAGTAGAGGGAGTGCAGGAA<br>CAAGAACTACAGGATGTAGGA<br>CACAAATGCATGGGTGTTGTA   | PPP2R2B | GACATTATCTCTACGGTAGAA<br>CAGCTTACTTTCTTCTGTCTA<br>GAGGATTAACCTATGGAACCT<br>GAAATTATCTCTTCGATTTCCG<br>TAATCTCACATACTGAATACT |
| AKT2     | GACAAAGATGGCCACATCAAG<br>GACTTTGGCCTCTGCAAAGAG<br>GACACAAGGTACTTCGATGAT<br>CAAGGTACTTCGATGATGAAT                            | IGF1R  | CATCTTCGAGATGACCAATCT<br>CATGTACTGCATCCCTTGTGA<br>CATCTTACTACATGGGCTGAA<br>GAGAATCCCAATGGATTGATT<br>AAACACATTTGGGATGTTTCT   | PTEN    | GATGGATTTCGACTTAGACTTG<br>AAGATCTTGACCAATGGCTAA<br>TATTATAGTACCTGTTAAAG<br>GATATCAAAGTAGAGTTCCTC<br>CAATAGGACATTGTGTGATGAT |
| AKT3     | AAAAACTGGAGGCCAAGATAC<br>GAATGAATTGTAGTCCAACCT<br>CACGTTTCTATGGTGCAGAAA<br>GAAATGATGTGGGAGGTTA<br>CATTCTGCTACTTCACTGTCA     | INPP5D | GAATTGCGTTTACACTTACAG<br>CATCAACATGGTGTCCAAGCT<br>CATCTGTACTGACAACGTGAA<br>GATTGAGTTTCTCAGTGCTA<br>GATTTGAGGGTGGAGATAG      | RPS6    | GATGAACGCAAACTTCGTA<br>GAAAATCAGTTCGTGGTTGCA<br>AATCTGAGCGTTCTCAACTTG<br>TACTTCTATGAGAAGCGTAT<br>AAACTTCGTACTTTCTATGAG     |
| AFX      | GAAATCAGTCATATGCAGAAT<br>CAGTTCAAATGCCAGCAGTGT<br>CAAGACAGAATGCCTCAGGAT<br>CATCAGTGACCTCATGGATGA<br>CACTTAGGCTTTGTAGCAAGA   | INSR   | CATGGATATCCGGAACAACCT<br>CACCAATACGTCATTACAAC<br>CAGTATGCCATCTTTGTGAAG<br>CACCTATTTCTACGTGACAGA<br>GAGTTCAGAGATCGTTCCTAT    | RPS6KA1 | CATTTTCGAGCTCCTCAAGGTT<br>TATCATTTACAGAGACCTCAA<br>CATGTCTTCTACTCCACCATT<br>GAAGAGATTGAGATTCTCTG<br>AAAAATGGCATCAACCACCAT  |
| CBL      | GACAAGAAGATGGTGGAGAAG<br>AAAAGACAATAGTCCCTTGGA<br>GATAAGGATGTAAGATTGAG<br>TATTCTGTTGGAGCAGAATCC<br>GATATCACATCAGTGGTTCCA    | IRS1   | CACAAACGCTTCTTCGTA<br>GATAATCGGTTCCGAAAGAGA<br>CAGATCATCAATCCCATCAGA<br>TACTCATTGCCAAGATCCTTT<br>CAGAATGAAGACCTAAATGAC      | RPS6KA3 | GAGAATGGACAGCAAATTATG<br>CAGAAGAAGATGTCAAATCT<br>CAACGATAGACTGGAATAAAC<br>AAAAGCAAGAGAGACCCAACA<br>GATATTTGGATCCATGGTGA    |
| CBLB     | GATGCTATTCAGGATGCAGTT<br>CAAAACTATCGTACCATGGAA<br>TAATCCTGATTTAACTGGATT<br>CAGAACTCACAGTACATCA<br>TACATCTTAATGGTCAGAATT     | mTOR   | CACTATGTACCATGGAACCTC<br>CAGATTCCACAGCTAAAGAAG<br>GATGAAATAGTACCCTCATG<br>GAGGTTATCCAGTACAACTT<br>TAGTAAATGCTTCCACTAAAC     | SGK     | CAATTCATCGCTTTCATGA<br>GAAAGGTTCTTCTAGCAAGAC<br>CACTGAACATCGTTTTATAGAG<br>GAAATGTACGACAACATTCTG<br>TATGTGTGTTCCGAATGTTT    |
| EIF4EBP1 | GATCATCTATGACCGGAAATT<br>CATCTATGACCGGAAATTCCT<br>GAAGAGTACAGTTTGAGATG<br>GACAAGAACGAACCCCTTCTT                             | PDK1   | CAAAATCGGTTTCATTGATGA<br>AAATGAAGATATGCACATCCA<br>CAGAAGATCATTAAAGTTGGAA<br>CAACATAGAGCAGTACATTCA<br>GATAAGCGGAAGGTTTATTT   | TSC1    | TATGCTTGTAAACACCTTGGT<br>TAGAAACTCATGATGTTGTGA<br>AAAGAAGAAGCTGCAATATCT<br>CATAATGCTGCCATGAAAGAT<br>AAAAGGATAACCCAGGTGTTT  |
| FKHR     | GATCTACGAGTGGATGGTCAA<br>AACAAACAGTAAATTTGCTAAG<br>CAAAGATGGCCTCTACTTTAC<br>TATACAAACACTTCAGGACAA<br>TAAAAGTACTTCAGATTGTCT  | PIK3CA | GAATGTTTACTACCAATGGA<br>AAAAGTAGAAGTATGTTGCTA<br>AAAATGGCTTTGAACTTTGG<br>TACTGAAGAAAGCATTGACTA<br>AATGAAAGCTCACTCTGGATT     | TSC2    | TAAACAGACGGAGTTTATCAT<br>CATCAACAGGCAGTTCTATGA<br>CAGCATTAACTCTTACCATA<br>CAATGAGTCACAGTCCCTTGA<br>CAGACATAGAGGCACAGATTG   |
| FKHRL1   | GACAATAGCAACAAGTATACC<br>GATGAAGTCCAGGACGATGAT<br>CATGTCACACTATGGTAACCA<br>CATGTTCAATGGGAGCTTGGGA<br>CAAACCTGACACAAGACCTACA | PIK3CB | GATTCACAGATAGCATCTGAT<br>AAAACGTTTACTATTTCATG<br>GACTTTAAAGGACAATTGAGA<br>GATTGTGCCCTCTAGATTTC<br>CATTGAGTGAACAGTAGCAA      |         |                                                                                                                            |
| GSK3A    | GACATCAAAGTATTGGCAAT<br>CAAGTTGACCATCCCTATCCT<br>CACTGATTACACCTCATCCAT<br>CATTCTCATCCCTCCTCACTT<br>GACTAGAGGGCAGAGTAAAT     | PIK3R1 | AAGAGAAGAAGATATTGACTT<br>CAGAATTACGACAGCTTCTTG<br>TACTGTAGCCAACAACGGTAT<br>TACATGAATATAACAACCTCAGT<br>GATCCTTCTCCTGAAGTTCAG |         |                                                                                                                            |
| GSK3B    | CATGAAAGTTAGCAGAGACAA<br>GAGAAAGCTAGATCACTGTAA<br>CAATGTTTCGTATATCTGTTC<br>GAGCAAATCAGAGAAATGAAC<br>AAAACCACCAGTTACTTGAG    | PIK3R2 | CATTTCAAGGGAGGAGGTGAA<br>CAATAAGCTGATCAAGGTCTT<br>CAAATACCAGCAGGACCAGAT<br>CAGATGAAGCGTACTGCAATT<br>GAAAGAGATGCAAAGGATCCT   |         |                                                                                                                            |
